# Supplementary material for: Freezing Does Not Alter Sperm Telomere Length despite Increasing DNA Oxidation and Fragmentation
Source: MDPI journal article supplement (doi:10.3390/genes14051039), 2023-05-03
Supplement: s1 [file s1]

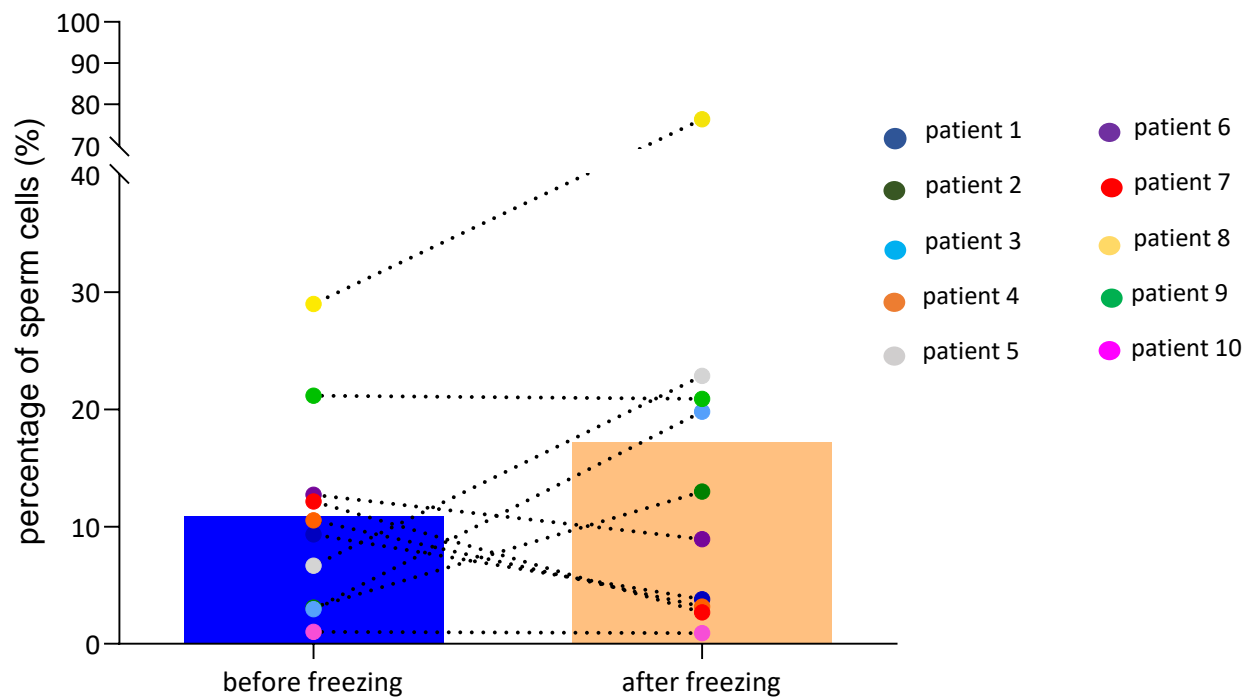

Figure S1: Mean and individual STL distribution of the shortest STL [0; 0.5 a.u.] measured by Q-FISH before and after freezing-thawing

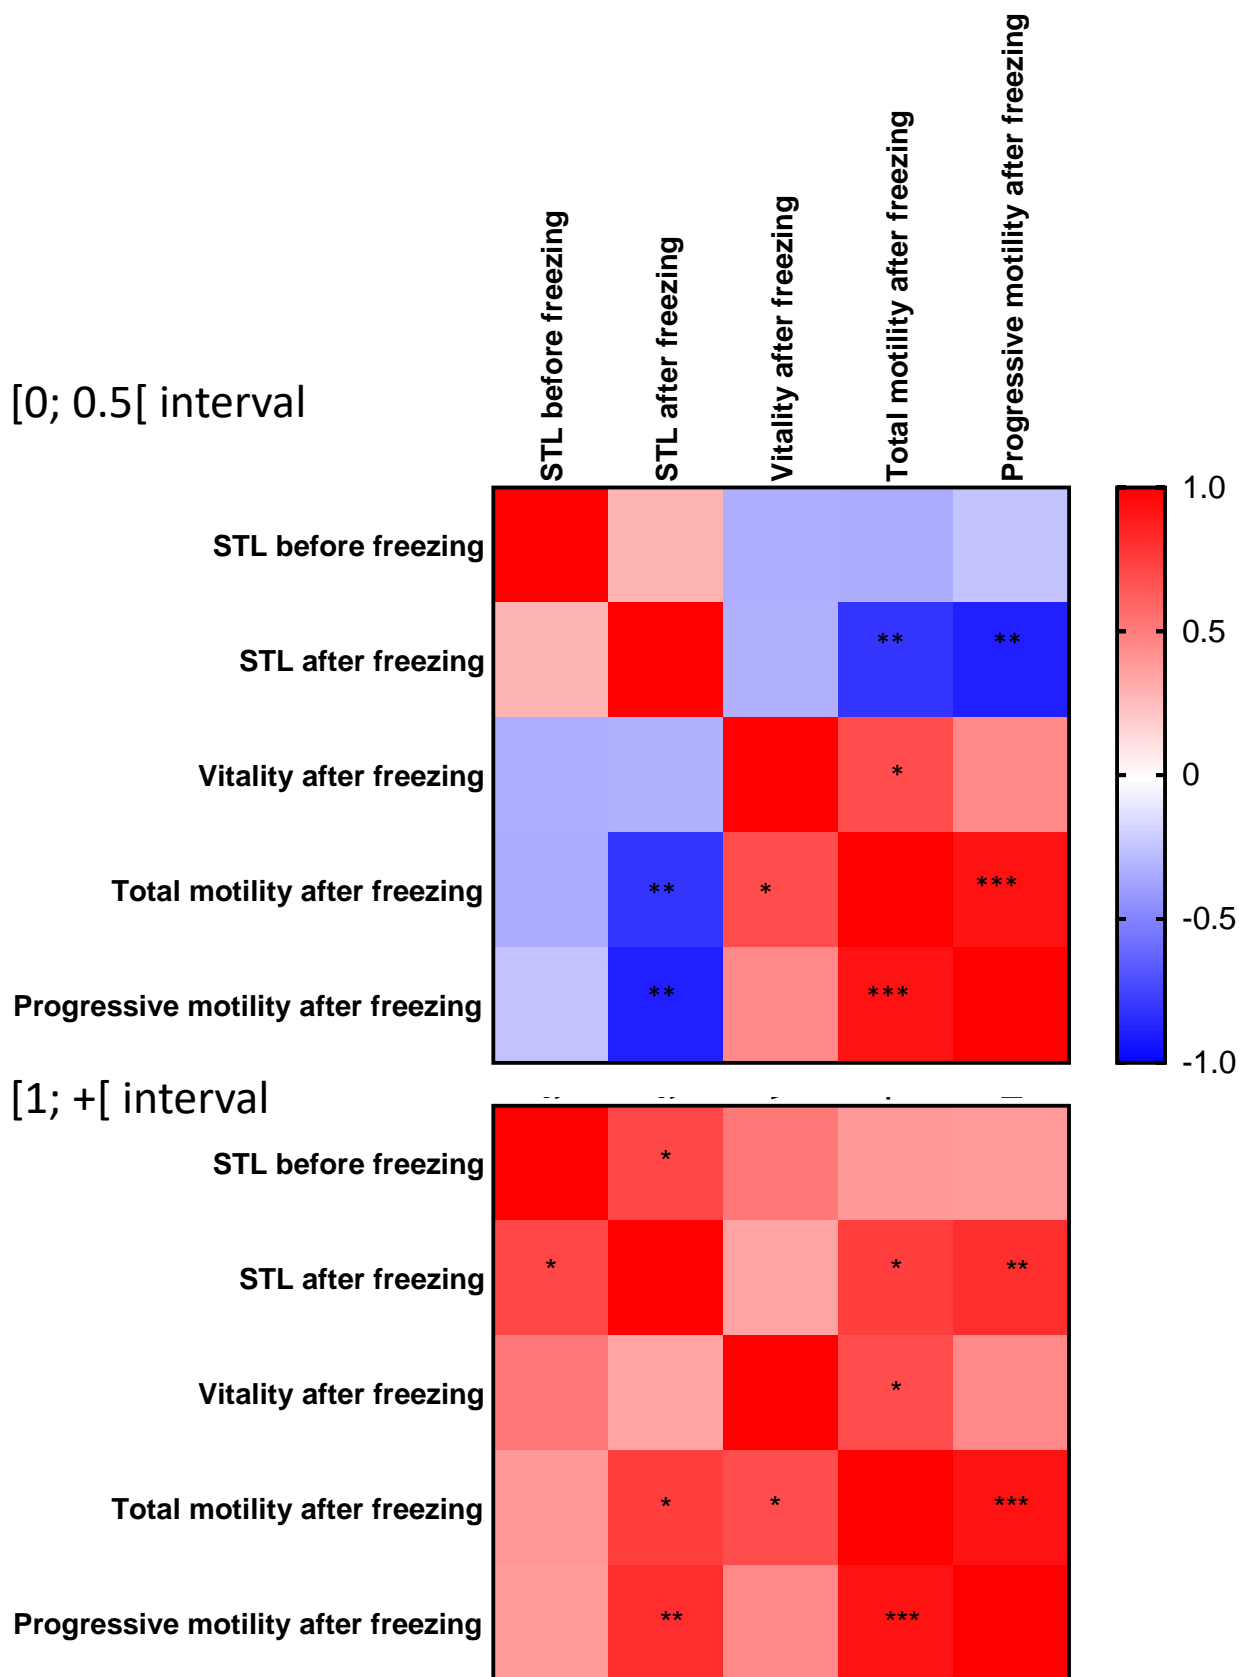

Figure S2: Heatmap of the correlations between the proportion of sperm cells having the shorter [0; 0.5 a.u.] and the longer STL [1; +[ measured by Q-FISH before and after freezing, and sperm parameters for frozen samples
